# Supplementary material for: A carboxymethyl cellulose modified magnetic bentonite composite for efficient enrichment of radionuclides
Source: Royal Society of Chemistry journal article supplement (doi:10.1039/c6ra10990j), 2016-01-01
Supplement: c6ra10990j1.pdf [file c6ra10990j1.pdf]

**Supporting Information (SI) on**

**Carboxymethyl cellulose modified magnetic bentonite composite for  
efficient enrichment of radionuclides**

Rui Hu<sup>a,b</sup>, Xuemei Ren<sup>b,\*</sup>, Guangshun Hou<sup>c</sup>, Dadong Shao<sup>b,\*</sup>, Yu Gong<sup>d</sup>, Xiaojun Chen<sup>d</sup>,  
Xiaoli Tan<sup>b</sup>, Xiangke Wang<sup>e</sup>, Masaaki Nagatsu<sup>a</sup>

<sup>a</sup>Graduate School of Science and Technology, Shizuoka University, Hamamatsu, 432-  
8561, Japan

<sup>b</sup>Institute of Plasma Physics, Chinese Academy of Sciences, P.X. Box 1126, Hefei  
230031, P.R. China

<sup>c</sup>Institute of Resources & Environment, Henan Polytechnic University, Jiaozuo 454003,  
P.R. China

<sup>d</sup>Institute of Nuclear physics and Chemistry, China Academy of Engineering Physics,  
Mianyang 621900, PR China

<sup>e</sup>School of Environment and Chemical Engineering, North China Electric Power  
University, Beijing 102206, P.R. China

\*Corresponding author: Tel: +86-551-65593308. Fax: +86-551-65591310.

E-mail: [xmren@ipp.ac.cn](mailto:xmren@ipp.ac.cn) (X.M. Ren), [shaodadong@126.com](mailto:shaodadong@126.com) (D.D Shao).

## 24 1. Models of adsorption kinetics

25 The kinetic results were modeled by the pseudo-first-order and pseudo-second-order  
26 rate equations, showing as follows:<sup>1</sup>

$$27 \quad \log(Q_e - Q_t) = \log Q_e - \frac{k_1}{2.303} t \quad (1)$$

$$28 \quad \frac{t}{Q_t} = \frac{1}{2K'Q_e^2} + \frac{t}{Q_e} \quad (2)$$

29 where  $Q_e$  ( $\text{mg} \cdot \text{g}^{-1}$ ) and  $Q_t$  ( $\text{mg} \cdot \text{g}^{-1}$ ) are the amount of radionuclides enriched at  
30 equilibrium and specific time  $t$  (h).  $k_1$  ( $\text{h}^{-1}$ ) and  $K'$  ( $\text{g} \cdot \text{mg}^{-1} \cdot \text{h}^{-1}$ ) are the kinetic rate  
31 constants of two equations, respectively.

## 32 2. Langmuir and Freundlich isotherm models

33 Langmuir adsorption isotherm model assumes that the adsorbent surfaces provide  
34 homogeneous binding sites and equivalent adsorption energies, and there is no interaction  
35 between adsorbed species.<sup>2</sup> It is always applied to describe monolayer adsorption  
36 behavior in different systems, and can be expressed in the following form:

$$37 \quad \frac{C_e}{Q_s} = \frac{1}{K_L Q_{s,\max}} + \frac{C_e}{Q_{s,\max}} \quad (3)$$

38 where  $Q_s$  ( $\text{mg} \cdot \text{g}^{-1}$ ) is the amount of enriched radionuclides on CMC-g-MB composite,  
39  $Q_{s,\max}$  ( $\text{mg} \cdot \text{g}^{-1}$ ) is the maximum of enriched radionuclides per unit weight of CMC-g-MB  
40 composite on the complete monolayer coverage,  $K_L$  ( $\text{L} \cdot \text{mg}^{-1}$ ) is the Langmuir adsorption  
41 coefficient implying adsorption enthalpy and varies with temperatures.

42 As an empirical equation, Freundlich isotherm model is based on the adsorption  
43 behavior occurred on heterogeneous surfaces, and is expressed by Eq. (4):

$$44 \quad \log Q_s = \log K_F + \frac{1}{n} \log C_e \quad (4)$$

45 where  $K_F$  ( $\text{mg}^{1-n} \cdot \text{L}^n \cdot \text{g}^{-1}$ ) is the Freundlich adsorption coefficient correlated with  
46 adsorption capacity and  $1/n$  is an index of isotherm non-linearity correlated with to the  
47 adsorption intensity at specific temperatures.<sup>3</sup>

## 48 3. Adsorption thermodynamics

49 The adsorption amounts of Cs(I), Sr(II) and Co(II) on CMC-g-MB composite increase  
50 as the temperature increases from 298 K to 338 K. Thermodynamic parameters including

51 average standard enthalpy change ( $\Delta H^0$ ), standard entropy change ( $\Delta S^0$ ) and standard  
 52 Gibbs free energy change ( $\Delta G^0$ ) of radionuclide adsorption on CMC-g-MB composite are  
 53 calculated from the temperature-dependent adsorption isotherms.  $\Delta G^0$  is expressed as the  
 54 following function:

$$55 \quad \Delta G^0 = -RT \ln K^0 \quad (5)$$

56 where  $R$  is the ideal gas constant ( $8.314 \text{ J} \cdot \text{mol}^{-1} \cdot \text{K}^{-1}$ ),  $K^0$  is the adsorption equilibrium  
 57 constant standing for the adsorption abilities of CMC-g-MB composite towards  
 58 radionuclides. The values of  $\ln K^0$  can be obtained by plotting  $\ln K_d$  versus  $C_e$  for  
 59 radionuclide adsorption and then extrapolating  $C_e$  to zero (Fig. S5).

60  $\Delta H^0$  and  $\Delta S^0$  can be achieved the slope and intercept of the plots of  $\ln K^0$  versus  $1/T$  by

61 Eq. (6):

$$62 \quad \Delta S^0 = - \left( \frac{\partial G^0}{\partial T} \right)_p \quad (6)$$

$$63 \quad \ln K^0 = \frac{\Delta S^0}{R} - \frac{\Delta H^0}{RT} \quad (7)$$

64 Linear plots of  $\ln K^0$  versus  $1/T$  for Cs(I), Sr(II) and Co(II) adsorption on CMC-g-MB  
 65 composite are shown in Fig. S5D.

66 **Table S1.** Parameters for kinetic models.

| Model               | Parameters                                               | Cs(I) | Sr(II) | Co(II) |
|---------------------|----------------------------------------------------------|-------|--------|--------|
| Pseudo first order  | $k_I$ ( $\text{h}^{-1}$ )                                | 0.217 | 0.220  | 0.215  |
|                     | $Q_e$ ( $\text{mg}\cdot\text{g}^{-1}$ )                  | 74.6  | 59.2   | 38.9   |
|                     | $R^2$                                                    | 0.948 | 0.946  | 0.953  |
| Pseudo second order | $K'$ ( $\text{g}\cdot\text{mg}^{-1}\cdot\text{h}^{-1}$ ) | 0.016 | 0.012  | 0.031  |
|                     | $Q_e$ ( $\text{mg}\cdot\text{g}^{-1}$ )                  | 79.7  | 62.5   | 40.2   |
|                     | $R^2$                                                    | 0.999 | 0.999  | 0.999  |
|                     | $Q_{e,exp}^a$ ( $\text{mg}\cdot\text{g}^{-1}$ )          | 80.5  | 63.0   | 41.1   |

67 <sup>a</sup> $Q_{e,exp}$  is the experimental value of adsorption capacity.

68

69 **Table S2.** Parameters simulated from Langmuir and Freundlich models.

| Experimental conditions |       | Langmuir model                                   |                                            |       | Freundlich model                                             |       |       |
|-------------------------|-------|--------------------------------------------------|--------------------------------------------|-------|--------------------------------------------------------------|-------|-------|
|                         |       | $Q_{s,max}$<br>( $\text{mg}\cdot\text{L}^{-1}$ ) | $K_L$<br>( $\text{L}\cdot\text{mg}^{-1}$ ) | $R^2$ | $K_F$ ( $\text{mg}^{1-n}\cdot\text{L}^n\cdot\text{g}^{-1}$ ) | $1/n$ | $R^2$ |
| CMC-g-MB                |       |                                                  |                                            |       |                                                              |       |       |
| Cs(I)                   | 298 K | 80.5                                             | 0.468                                      | 0.996 | 29.9                                                         | 0.319 | 0.899 |
|                         | 318 K | 87.7                                             | 0.497                                      | 0.995 | 33.0                                                         | 0.321 | 0.929 |
|                         | 338 K | 96.7                                             | 0.508                                      | 0.998 | 36.4                                                         | 0.333 | 0.966 |
| Sr(II)                  | 298 K | 63.0                                             | 0.299                                      | 0.995 | 19.9                                                         | 0.336 | 0.936 |
|                         | 318 K | 71.2                                             | 0.285                                      | 0.996 | 21.3                                                         | 0.359 | 0.945 |
|                         | 338 K | 81.4                                             | 0.302                                      | 0.999 | 24.5                                                         | 0.370 | 0.948 |
| Co(II)                  | 298 K | 41.1                                             | 0.373                                      | 0.991 | 16.1                                                         | 0.271 | 0.910 |
|                         | 318 K | 49.7                                             | 0.327                                      | 0.994 | 17.3                                                         | 0.302 | 0.948 |
|                         | 338 K | 64.8                                             | 0.272                                      | 0.996 | 19.9                                                         | 0.343 | 0.963 |
| MB                      |       |                                                  |                                            |       |                                                              |       |       |
| Cs(I)                   | 298 K | 48.5                                             | 0.250                                      | 0.991 | 13.7                                                         | 0.368 | 0.904 |
| Sr(II)                  | 298 K | 39.5                                             | 0.070                                      | 0.996 | 5.60                                                         | 0.483 | 0.957 |
| Co(II)                  | 298 K | 26.3                                             | 0.065                                      | 0.986 | 3.37                                                         | 0.505 | 0.930 |

70

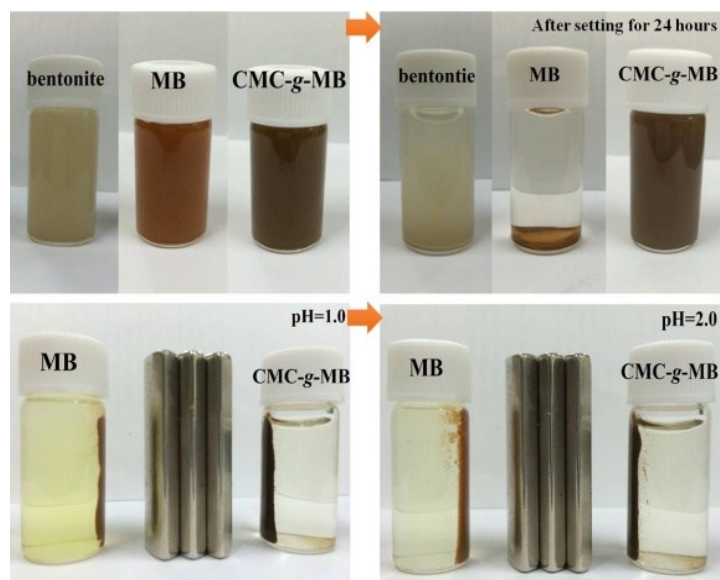

71  
 72 **Fig. S1.** Dispersion images of bentonite, MB and CMC-g-MB composite (settling for 24  
 73 hours), and stability evaluation of MB and CMC-g-MB composite in acid conditions.  
 74

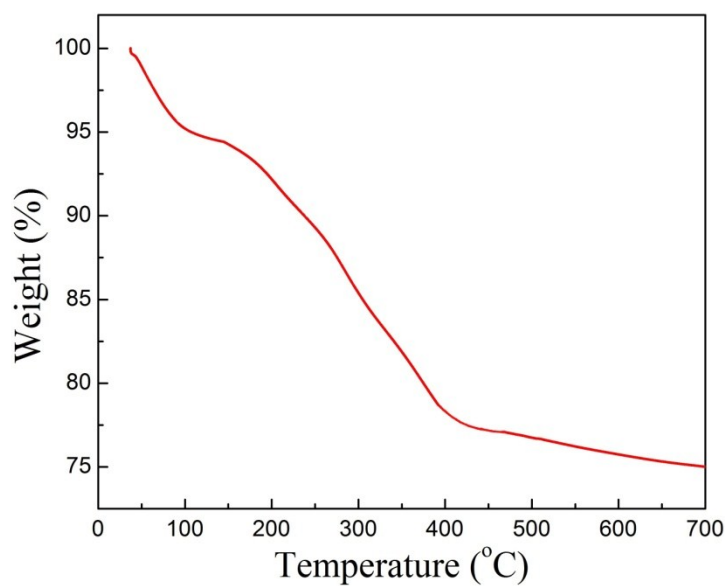

75  
 76 **Fig. S2.** Typical TGA curve of CMC-g-MB composite.

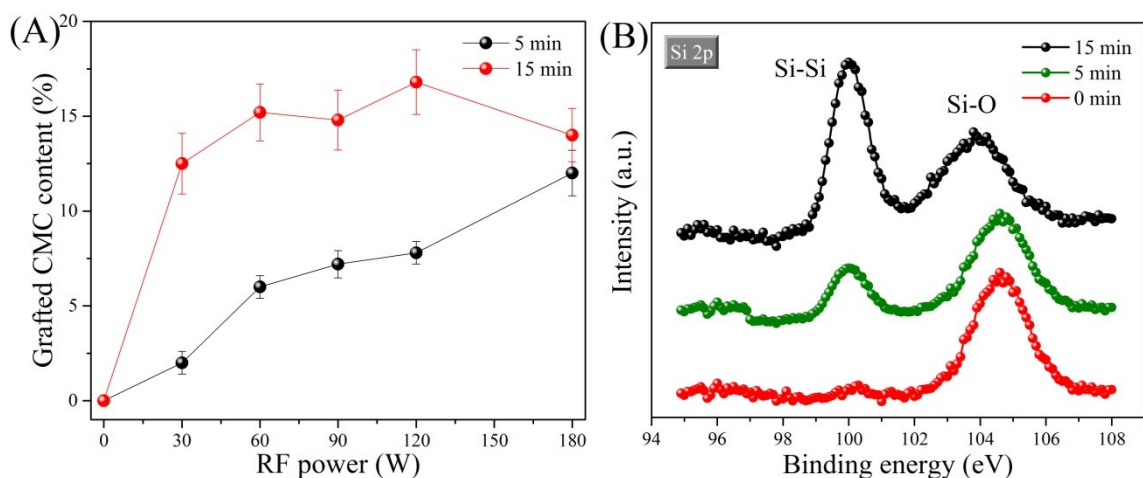

77

78 **Fig. S3.** Influences of RF power and time on the CMC grafting content (A); XPS Si 2p  
79 spectra of CMC-g-MB composite treated with different duration times of RF plasma (B).

80

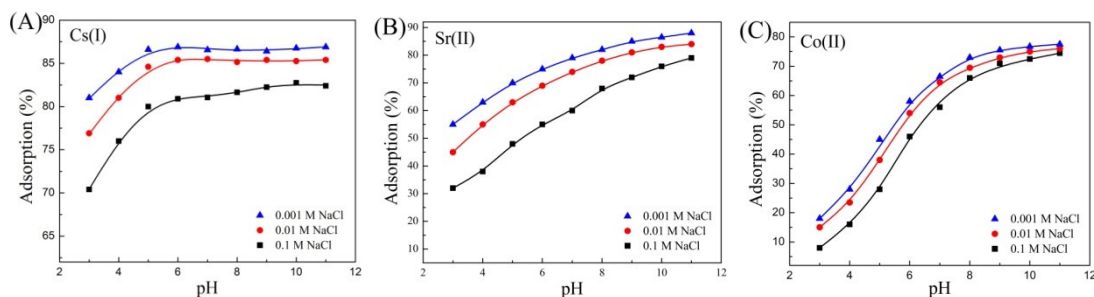

81

82 **Fig. S4.** Effect of pH on Cs(I), Sr(II) and Co(II) adsorption with different ionic strengths.  
83  $m/V = 0.5 \text{ g} \cdot \text{L}^{-1}$ ,  $T = 298 \text{ K}$ ,  $C_{\text{initial}} = 20 \text{ mg} \cdot \text{L}^{-1}$  for all cations.

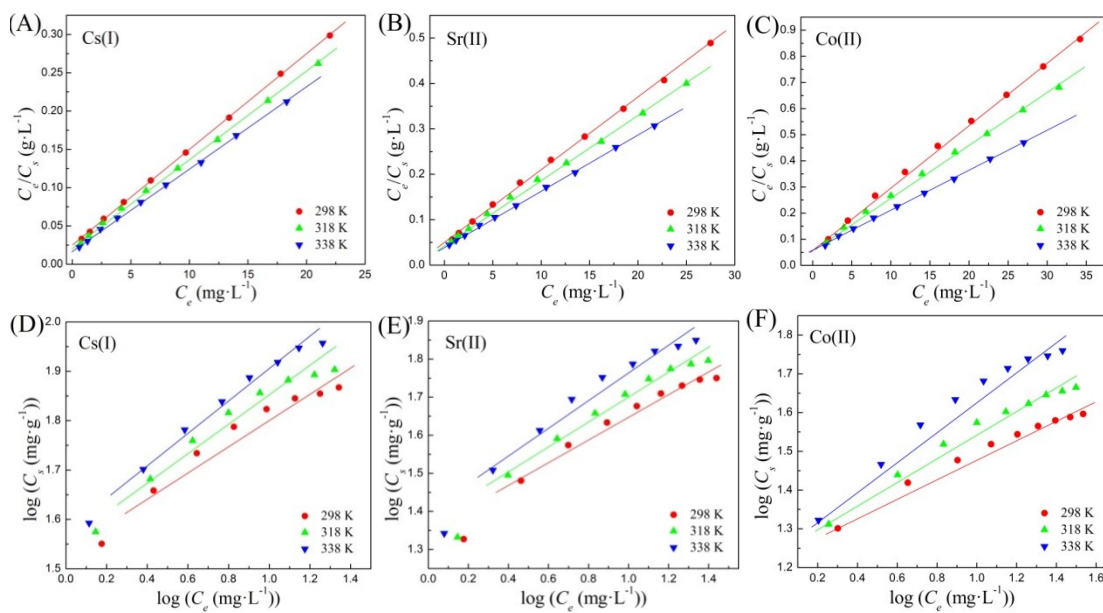

**Fig. S5.** Langmuir isotherms of Cs(I) (A), Sr(II) (B), Co(II) (C) and Freundlich isotherms of Cs(I) (D), Sr(II) (E), Co(II) (F) adsorption on CMC-g-MB composite at different temperatures,  $pH = 6.0 \pm 0.1$ ,  $m/V = 0.5 \text{ g} \cdot \text{L}^{-1}$ ,  $I = 0.01 \text{ M NaCl}$ .

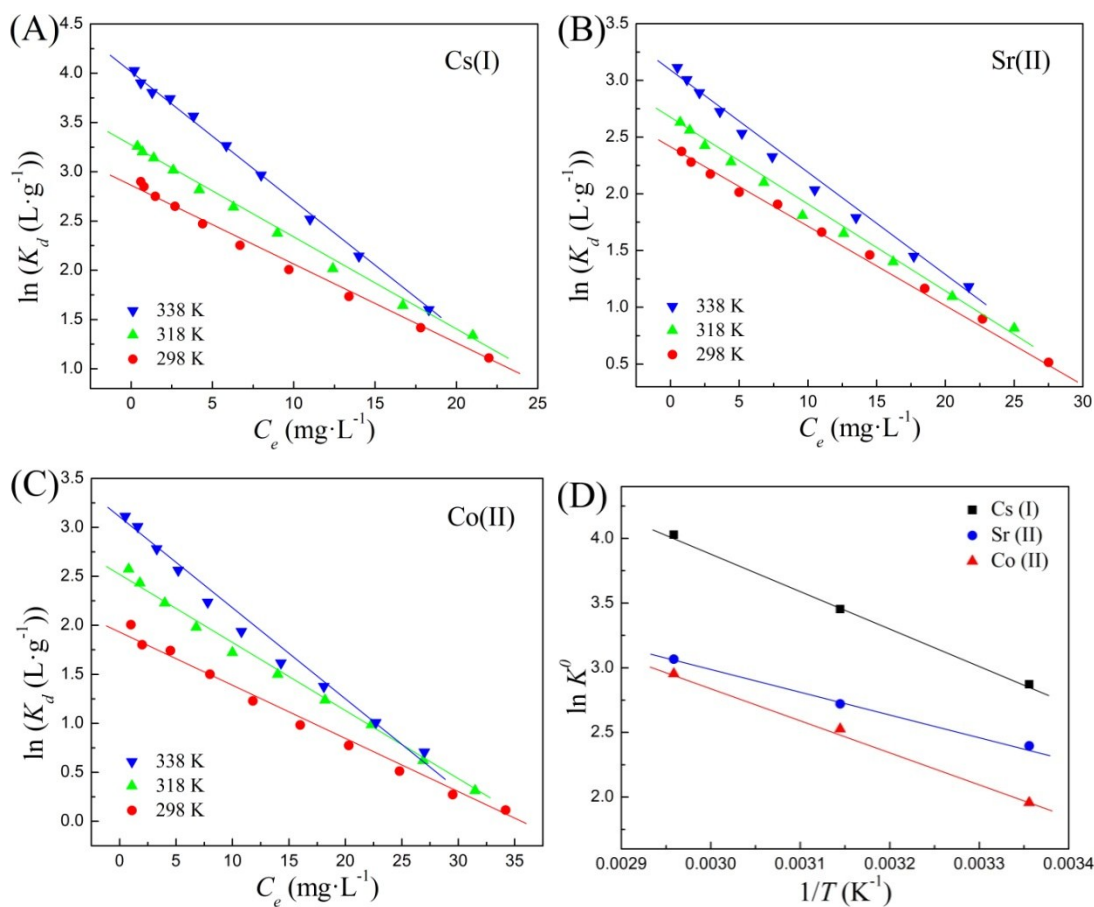

89

90

91 **Fig. S6.** Linear plots of  $\ln K_d$  versus  $C_e$  for the adsorption of Cs(I) (A), Sr(II) (B) and  
 92 Co(II) (C). Linear plots of  $\ln K^0$  versus  $1/T$  for the radionuclide adsorption (D).  $pH = 6.0 \pm$   
 93  $0.1$ ,  $m/V = 0.5 \text{ g} \cdot \text{L}^{-1}$ ,  $I = 0.01 \text{ M NaCl}$ .

94 **References**

- 95 1. Y. S. Ho and G. McKay, *Process Biochem.*, 1999, **34**, 451–465.
- 96 2. C. H. Wu, *J. Hazard. Mater.*, 2007, **144**, 93–100.
- 97 3. F. A. Digiano, G. Baldauf, B. Frick and H. Sontheimer, *Chem. Eng. Sci.*, 1978, **33**,
- 98 1667–1673.
